# Supplementary material for: Research on the measurement of intracranial hemorrhage in rabbits by a parallel-plate capacitor
Source: PeerJ. 2021 Jan 5;9:e10583. doi: 10.7717/peerj.10583 (PMC7792518; doi:10.7717/peerj.10583)
Supplement: Supplemental Information 1 [file peerj-09-10583-s001.xlsx]

## Sheet: positions along the Z-axis
h=10mm	physiological saline	vegetable oil	Capacitance difference
1	51.9126	51.8617	0.0509281
2	51.914	51.8626	0.0514168
3	51.9143	51.8633	0.0510709
4	51.9154	51.8644	0.0509908
	Average Capacitance differenceof 1,2,3.4		0.0511017
h=25mm	physiological saline	vegetable oil	Capacitance difference
1	51.7717	51.7484	0.023235
2	51.7722	51.7488	0.0233522
3	51.7722	51.7492	0.0229829
4	51.773	51.7497	0.023304
	Average Capacitance differenceof 1,2,3.4		0.0232185
h=45mm	physiological saline	vegetable oil	Capacitance difference
1	51.7431	51.726	0.0170317
2	51.7441	51.7266	0.0175593
3	51.744	51.7261	0.0178843
4	51.7445	51.7267	0.0177725
	Average Capacitance differenceof 1,2,3.4		0.017562
h=65mm	physiological saline	vegetable oil	Capacitance difference
1	51.7574	51.7335	0.0239602
2	51.7574	51.7337	0.0237317
3	51.7577	51.7337	0.0240444
4	51.7575	51.7338	0.0236637
	Average Capacitance differenceof 1,2,3.4		0.02385
h=80mm	physiological saline	vegetable oil	Capacitance difference
1	51.7886	51.7454	0.0432115
2	51.7884	51.745	0.0434044
3	51.788	51.7453	0.0427511
4	51.7881	51.7453	0.0428686
	Average Capacitance differenceof 1,2,3.4		0.0430589

## Sheet: positions  along the X-axis
h=10mm	x=0mm	physiological saline	vegetable oil	Capacitance difference
	1	51.9224	51.8667	0.0556909
	2	51.9238	51.8679	0.055848
	3	51.9246	51.8691	0.0555372
	4	51.926	51.8699	0.0561086
		Average Capacitance differenceof 1,2,3.4		0.0557962
	x=10mm	physiological saline	vegetable oil	Capacitance difference
	1	51.9086	51.8548	0.053866
	2	51.9097	51.8553	0.0543641
	3	51.9119	51.8573	0.0545772
	4	51.9129	51.8579	0.0549481
		Average Capacitance differenceof 1,2,3.4		0.0544389
	x=20mm	physiological saline	vegetable oil	Capacitance difference
	1	51.8912	51.8389	0.052337
	2	51.8926	51.84	0.0525744
	3	51.8946	51.842	0.0526462
	4	51.8963	51.8431	0.0532278
		Average Capacitance differenceof 1,2,3.4		0.0526963
	x=30mm	physiological saline	vegetable oil	Capacitance difference
	1	51.8596	51.8156	0.044028
	2	51.8611	51.8168	0.0443246
	3	51.8645	51.8196	0.0449022
	4	51.8659	51.8206	0.0452673
		Average Capacitance differenceof 1,2,3.4		0.0446305
