# Supplementary material for: Research on the measurement of intracranial hemorrhage in rabbits by a parallel-plate capacitor
Source: PeerJ. 2021 Jan 5;9:e10583. doi: 10.7717/peerj.10583 (PMC7792518; doi:10.7717/peerj.10583)
Supplement: Supplemental Information 2 [file peerj-09-10583-s002.xlsx]

## Sheet: Raw data of Physics Experiment2
h=10mm							Capacitance difference of physiological saline	Capacitance difference of glycerin	Capacitance difference of vegetable oil
	physiological saline	without liquid	Capacitance difference		h=10mm	Average of 1,2	0.0532538	0.0430459	0.0121711
1	51.9342	51.8813	0.0528747			Average of 3,4	0.0543257	0.0436084	0.0121164
2	51.9364	51.8827	0.0536328			Average of 1,2,3,4	0.0537897	0.0433271	0.0121438
	Average of 1,2		0.0532538
	glycerin	without liquid	Capacitance difference
1	51.9267	51.8838	0.0428756				Capacitance difference of physiological saline	Capacitance difference of glycerin	Capacitance difference of vegetable oil
2	51.9281	51.8849	0.0432161		h=45mm	Average of 1,2	0.0218268	0.0172065	0.00477936
	Average of 1,2		0.0430459			Average of 3,4	0.0220516	0.0172529	0.00478239
						Average of 1,2,3,4	0.0219392	0.0172297	0.00478087
	vegetable oil	without liquid	Capacitance difference
1	51.8974	51.8852	0.0122254
2	51.8981	51.886	0.0121167
	Average of 1,2		0.0121711
	physiological saline	without liquid	Capacitance difference
3	51.9382	51.884	0.0541782
4	51.9389	51.8845	0.0544732
	Average of 3,4		0.0543257
	glycerin	without liquid	Capacitance difference
3	51.9287	51.8853	0.0434034
4	51.9293	51.8854	0.0438133
	Average of 3,4		0.0436084
	vegetable oil	without liquid	Capacitance difference
3	51.8982	51.886	0.0121576
4	51.8987	51.8866	0.0120753
	Average of 3,4		0.0121164
h=45mm
	physiological saline	without liquid	Capacitance difference
1	51.8185	51.7968	0.0217056
2	51.8192	51.7972	0.0219481
	Average of 1,2		0.0218268
	glycerin	without liquid	Capacitance difference
1	51.8145	51.7974	0.017164
2	51.8148	51.7975	0.017249
	Average of 1,2		0.0172065
	vegetable oil	without liquid	Capacitance difference
1	51.8026	51.798	0.00464814
2	51.8033	51.7984	0.00491058
	Average of 1,2		0.00477936
	physiological saline	without liquid	Capacitance difference
3	51.819	51.7969	0.0220311
4	51.8195	51.7975	0.022072
	Average of 3,4		0.0220516
	glycerin	without liquid	Capacitance difference
3	51.815	51.7979	0.017045
4	51.8156	51.7981	0.0174609
	Average of 3,4		0.0172529
	vegetable oil	without liquid	Capacitance difference															2272-3061
3	51.8032	51.7985	0.00467972
4	51.8036	51.7987	0.00488505
	Average of 3,4		0.00478239
