# Supplementary material for: Research on the measurement of intracranial hemorrhage in rabbits by a parallel-plate capacitor
Source: PeerJ. 2021 Jan 5;9:e10583. doi: 10.7717/peerj.10583 (PMC7792518; doi:10.7717/peerj.10583)
Supplement: Supplemental Information 3 [file peerj-09-10583-s003.xlsx]

## Sheet: Raw data of Physics Experiment3
C(pf)		time(s)
51.7883	0	0
51.7884	1	0.0508475
51.7884	2	0.101695
51.7869	3	0.152542
51.7869	4	0.20339
51.7885	5	0.254237
51.7885	6	0.305085
51.7883	7	0.355932
51.7883	8	0.40678
51.7867	9	0.457627
51.7867	10	0.508475
51.7875	11	0.559322
51.7875	12	0.610169
51.7884	13	0.661017
51.7884	14	0.711864
51.7868	15	0.762712
51.7868	16	0.813559
51.7874	17	0.864407
51.7874	18	0.915254
51.7884	19	0.966102
51.7884	20	1.01695
51.7872	21	1.0678
51.7872	22	1.11864
51.7872	23	1.16949
51.7877	24	1.22034
51.7877	25	1.27119
51.7886	26	1.32203
51.7886	27	1.37288
51.7876	28	1.42373
51.7876	29	1.47458
51.7872	30	1.52542
51.7872	31	1.57627
51.7889	32	1.62712
51.7889	33	1.67797
51.7882	34	1.72881
51.7882	35	1.77966
51.7875	36	1.83051
51.7875	37	1.88136
51.789	38	1.9322
51.789	39	1.98305
51.788	40	2.0339
51.788	41	2.08475
51.7873	42	2.13559
51.7873	43	2.18644
51.7888	44	2.23729
51.7888	45	2.28814
51.7885	46	2.33898
51.7885	47	2.38983
51.7873	48	2.44068
51.7873	49	2.49153
51.7887	50	2.54237
51.7887	51	2.59322
51.7883	52	2.64407
51.7883	53	2.69492
51.7869	54	2.74576
51.7869	55	2.79661
51.7869	56	2.84746
51.7878	57	2.89831
51.7878	58	2.94915
51.7885	59	3
51.7885	60	3.05085
51.7872	61	3.10169
51.7872	62	3.15254
51.7878	63	3.20339
51.7878	64	3.25424
51.7891	65	3.30508
51.7891	66	3.35593
51.7875	67	3.40678
51.7875	68	3.45763
51.7878	69	3.50847
51.7878	70	3.55932
51.7888	71	3.61017
51.7888	72	3.66102
51.788	73	3.71186
51.788	74	3.76271
51.7878	75	3.81356
51.7878	76	3.86441
51.7892	77	3.91525
51.7892	78	3.9661
51.7878	79	4.01695
51.7878	80	4.0678
51.7874	81	4.11864
51.7874	82	4.16949
51.7889	83	4.22034
51.7889	84	4.27119
51.788	85	4.32203
51.788	86	4.37288
51.787	87	4.42373
51.787	88	4.47458
51.787	89	4.52542
51.7889	90	4.57627
51.7889	91	4.62712
51.7886	92	4.67797
51.7886	93	4.72881
51.7876	94	4.77966
51.7876	95	4.83051
51.7889	96	4.88136
51.7889	97	4.9322
51.7884	98	4.98305
51.7884	99	5.0339
51.7873	100	5.08475
51.7873	101	5.13559
51.7884	102	5.18644
51.7884	103	5.23729
51.7886	104	5.28814
51.7886	105	5.33898
51.7871	106	5.38983
51.7871	107	5.44068
51.788	108	5.49153
51.788	109	5.54237
51.7885	110	5.59322
51.7885	111	5.64407
51.7875	112	5.69492
51.7875	113	5.74576
51.788	114	5.79661
51.788	115	5.84746
51.7887	116	5.89831
51.7887	117	5.94915
51.7887	118	6
51.7875	119	6.05085
51.7875	120	6.10169
51.7876	121	6.15254
51.7876	122	6.20339
51.789	123	6.25424
51.789	124	6.30508
51.7874	125	6.35593
51.7874	126	6.40678
51.7872	127	6.45763
51.7872	128	6.50847
51.7887	129	6.55932
51.7887	130	6.61017
51.7871	131	6.66102
51.7871	132	6.71186
51.7873	133	6.76271
51.7873	134	6.81356
51.7885	135	6.86441
51.7885	136	6.91525
51.7877	137	6.9661
51.7877	138	7.01695
51.7871	139	7.0678
51.7871	140	7.11864
51.7883	141	7.16949
51.7883	142	7.22034
51.7878	143	7.27119
51.7878	144	7.32203
51.7869	145	7.37288
51.7869	146	7.42373
51.7889	147	7.47458
51.7889	148	7.52542
51.7889	149	7.57627
51.7879	150	7.62712
51.7879	151	7.67797
51.7866	152	7.72881
51.7866	153	7.77966
51.7884	154	7.83051
51.7884	155	7.88136
51.7881	156	7.9322
51.7881	157	7.98305
51.7871	158	8.0339
51.7871	159	8.08475
51.7884	160	8.13559
51.7884	161	8.18644
51.788	162	8.23729
51.788	163	8.28814
51.7871	164	8.33898
51.7871	165	8.38983
51.7878	166	8.44068
51.7878	167	8.49153
51.7881	168	8.54237
51.7881	169	8.59322
51.7865	170	8.64407
51.7865	171	8.69492
51.7876	172	8.74576
51.7876	173	8.79661
51.7886	174	8.84746
51.7886	175	8.89831
51.7868	176	8.94915
51.7868	177	9
51.7868	178	9.05085
51.7873	179	9.10169
51.7873	180	9.15254
51.7888	181	9.20339
51.7888	182	9.25424
51.7871	183	9.30508
51.7871	184	9.35593
51.7869	185	9.40678
51.7869	186	9.45763
51.7887	187	9.50847
51.7887	188	9.55932
51.787	189	9.61017
51.787	190	9.66102
51.7871	191	9.71186
51.7871	192	9.76271
51.7883	193	9.81356
51.7883	194	9.86441
51.7876	195	9.91525
51.7876	196	9.9661
51.7869	197	10.0169
51.7869	198	10.0678
51.7886	199	10.1186
51.7886	200	10.1695
51.7873	201	10.2203
51.7873	202	10.2712
51.7868	203	10.322
51.7868	204	10.3729
51.7881	205	10.4237
51.7881	206	10.4746
51.7881	207	10.5254
51.7876	208	10.5763
51.7876	209	10.6271
51.7869	210	10.678
51.7869	211	10.7288
51.7884	212	10.7797
51.7884	213	10.8305
51.7878	214	10.8814
51.7878	215	10.9322
51.7865	216	10.9831
51.7865	217	11.0339
51.7879	218	11.0847
51.7879	219	11.1356
51.788	220	11.1864
51.788	221	11.2373
51.7866	222	11.2881
51.7866	223	11.339
51.788	224	11.3898
51.788	225	11.4407
51.7883	226	11.4915
51.7883	227	11.5424
51.7866	228	11.5932
51.7866	229	11.6441
51.7874	230	11.6949
51.7874	231	11.7458
51.788	232	11.7966
51.788	233	11.8475
51.787	234	11.8983
51.787	235	11.9492
51.7872	236	12
51.7872	237	12.0508
51.7872	238	12.1017
51.7885	239	12.1525
51.7885	240	12.2034
51.7866	241	12.2542
51.7866	242	12.3051
51.7867	243	12.3559
51.7867	244	12.4068
51.7881	245	12.4576
51.7881	246	12.5085
51.7868	247	12.5593
51.7868	248	12.6102
51.7867	249	12.661
51.7867	250	12.7119
51.7878	251	12.7627
51.7878	252	12.8136
51.7867	253	12.8644
51.7867	254	12.9153
51.7865	255	12.9661
51.7865	256	13.0169
51.7878	257	13.0678
51.7878	258	13.1186
51.7871	259	13.1695
51.7871	260	13.2203
51.7862	261	13.2712
51.7862	262	13.322
51.7877	263	13.3729
51.7877	264	13.4237
51.7871	265	13.4746
51.7871	266	13.5254
51.7861	267	13.5763
51.7861	268	13.6271
51.7878	269	13.678
51.7878	270	13.7288
51.7878	271	13.7797
51.7875	272	13.8305
51.7875	273	13.8814
51.786	274	13.9322
51.786	275	13.9831
51.7875	276	14.0339
51.7875	277	14.0847
51.7874	278	14.1356
51.7874	279	14.1864
51.7859	280	14.2373
51.7859	281	14.2881
51.7871	282	14.339
51.7871	283	14.3898
51.7877	284	14.4407
51.7877	285	14.4915
51.7863	286	14.5424
51.7863	287	14.5932
51.7872	288	14.6441
51.7872	289	14.6949
51.7875	290	14.7458
51.7875	291	14.7966
51.7862	292	14.8475
51.7862	293	14.8983
51.7864	294	14.9492
51.7864	295	15
51.7879	296	15.0508
51.7879	297	15.1017
51.7865	298	15.1525
51.7865	299	15.2034
51.7864	300	15.2542
51.7864	301	15.3051
51.7864	302	15.3559
51.7877	303	15.4068
51.7877	304	15.4576
51.7862	305	15.5085
51.7862	306	15.5593
51.7866	307	15.6102
51.7866	308	15.661
51.788	309	15.7119
51.788	310	15.7627
51.7871	311	15.8136
51.7871	312	15.8644
51.7864	313	15.9153
51.7864	314	15.9661
51.7878	315	16.0169
51.7878	316	16.0678
51.7864	317	16.1186
51.7864	318	16.1695
51.7863	319	16.2203
51.7863	320	16.2712
51.7877	321	16.322
51.7877	322	16.3729
51.7868	323	16.4237
51.7868	324	16.4746
51.7862	325	16.5254
51.7862	326	16.5763
51.7875	327	16.6271
51.7875	328	16.678
51.7869	329	16.7288
51.7869	330	16.7797
51.786	331	16.8305
51.786	332	16.8814
51.7874	333	16.9322
51.7874	334	16.9831
51.788	335	17.0339
51.788	336	17.0847
51.788	337	17.1356
51.7861	338	17.1864
51.7861	339	17.2373
51.7873	340	17.2881
51.7873	341	17.339
51.7873	342	17.3898
51.7873	343	17.4407
51.7858	344	17.4915
51.7858	345	17.5424
51.787	346	17.5932
51.787	347	17.6441
51.7878	348	17.6949
51.7878	349	17.7458
51.7862	350	17.7966
51.7862	351	17.8475
51.7865	352	17.8983
51.7865	353	17.9492
51.7877	354	18
51.7877	355	18.0508
51.7866	356	18.1017
51.7866	357	18.1525
51.7863	358	18.2034
51.7863	359	18.2542
51.7882	360	18.3051
51.7882	361	18.3559
51.7864	362	18.4068
51.7864	363	18.4576
51.7864	364	18.5085
51.7867	365	18.5593
51.7867	366	18.6102
51.7876	367	18.661
51.7876	368	18.7119
51.7867	369	18.7627
51.7867	370	18.8136
51.7861	371	18.8644
51.7861	372	18.9153
51.7879	373	18.9661
51.7879	374	19.0169
51.787	375	19.0678
51.787	376	19.1186
51.7864	377	19.1695
51.7864	378	19.2203
51.7879	379	19.2712
51.7879	380	19.322
51.7867	381	19.3729
51.7867	382	19.4237
51.7859	383	19.4746
51.7859	384	19.5254
51.7873	385	19.5763
51.7873	386	19.6271
51.7874	387	19.678
51.7874	388	19.7288
51.7862	389	19.7797
51.7862	390	19.8305
51.7862	391	19.8814
51.7876	392	19.9322
51.7876	393	19.9831
51.7877	394	20.0339
51.7877	395	20.0847
51.7867	396	20.1356
51.7867	397	20.1864
51.7877	398	20.2373
51.7877	399	20.2881
51.7879	400	20.339
51.7879	401	20.3898
51.7867	402	20.4407
51.7867	403	20.4915
51.7876	404	20.5424
51.7876	405	20.5932
51.7885	406	20.6441
51.7885	407	20.6949
51.7868	408	20.7458
51.7868	409	20.7966
51.7872	410	20.8475
51.7872	411	20.8983
51.7885	412	20.9492
51.7885	413	21
51.7868	414	21.0508
51.7868	415	21.1017
51.7871	416	21.1525
51.7871	417	21.2034
51.7884	418	21.2542
51.7884	419	21.3051
51.7884	420	21.3559
51.7874	421	21.4068
51.7874	422	21.4576
51.7872	423	21.5085
51.7872	424	21.5593
51.7891	425	21.6102
51.7891	426	21.661
51.7874	427	21.7119
51.7874	428	21.7627
51.7871	429	21.8136
51.7871	430	21.8644
51.7888	431	21.9153
51.7888	432	21.9661
51.788	433	22.0169
51.788	434	22.0678
51.7872	435	22.1186
51.7872	436	22.1695
51.7888	437	22.2203
51.7888	438	22.2712
51.7881	439	22.322
51.7881	440	22.3729
51.7871	441	22.4237
51.7871	442	22.4746
51.7891	443	22.5254
51.7891	444	22.5763
51.7886	445	22.6271
51.7886	446	22.678
51.7872	447	22.7288
51.7872	448	22.7797
51.7872	449	22.8305
51.7887	450	22.8814
51.7887	451	22.9322
51.7883	452	22.9831
51.7883	453	23.0339
51.7871	454	23.0847
51.7871	455	23.1356
51.7883	456	23.1864
51.7883	457	23.2373
51.7886	458	23.2881
51.7886	459	23.339
51.7876	460	23.3898
51.7876	461	23.4407
51.7879	462	23.4915
51.7879	463	23.5424
51.7888	464	23.5932
51.7888	465	23.6441
51.7873	466	23.6949
51.7873	467	23.7458
51.788	468	23.7966
51.788	469	23.8475
51.7891	470	23.8983
51.7891	471	23.9492
51.7877	472	24
51.7877	473	24.0508
51.7879	474	24.1017
51.7879	475	24.1525
51.7893	476	24.2034
51.7893	477	24.2542
51.7876	478	24.3051
51.7876	479	24.3559
51.7876	480	24.4068
51.7874	481	24.4576
51.7874	482	24.5085
51.7886	483	24.5593
51.7886	484	24.6102
51.7877	485	24.661
51.7877	486	24.7119
51.787	487	24.7627
51.787	488	24.8136
51.7885	489	24.8644
51.7885	490	24.9153
51.7882	491	24.9661
51.7882	492	25.0169
51.7868	493	25.0678
51.7868	494	25.1186
51.7883	495	25.1695
51.7883	496	25.2203
51.7879	497	25.2712
51.7879	498	25.322
51.7866	499	25.3729
51.7866	500	25.4237
51.7883	501	25.4746
51.7883	502	25.5254
51.7881	503	25.5763
51.7881	504	25.6271
51.7869	505	25.678
51.7869	506	25.7288
51.7869	507	25.7797
51.7878	508	25.8305
51.7878	509	25.8814
51.7888	510	25.9322
51.7888	511	25.9831
51.7868	512	26.0339
51.7868	513	26.0847
51.7877	514	26.1356
51.7877	515	26.1864
51.7884	516	26.2373
51.7884	517	26.2881
51.7871	518	26.339
51.7871	519	26.3898
51.7872	520	26.4407
51.7872	521	26.4915
51.7883	522	26.5424
51.7883	523	26.5932
51.7869	524	26.6441
51.7869	525	26.6949
51.7868	526	26.7458
51.7868	527	26.7966
51.7886	528	26.8475
51.7886	529	26.8983
51.7876	530	26.9492
51.7876	531	27
51.7872	532	27.0508
51.7872	533	27.1017
51.7888	534	27.1525
51.7888	535	27.2034
51.7888	536	27.2542
51.7877	537	27.3051
51.7877	538	27.3559
51.7875	539	27.4068
51.7875	540	27.4576
51.7888	541	27.5085
51.7888	542	27.5593
51.7879	543	27.6102
51.7879	544	27.661
51.7875	545	27.7119
51.7875	546	27.7627
51.789	547	27.8136
51.789	548	27.8644
51.7882	549	27.9153
51.7882	550	27.9661
51.7876	551	28.0169
51.7876	552	28.0678
51.789	553	28.1186
51.789	554	28.1695
51.7882	555	28.2203
51.7882	556	28.2712
51.7872	557	28.322
51.7872	558	28.3729
51.7883	559	28.4237
51.7883	560	28.4746
51.788	561	28.5254
51.788	562	28.5763
51.788	563	28.6271
51.7873	564	28.678
51.7873	565	28.7288
51.7883	566	28.7797
51.7883	567	28.8305
51.7884	568	28.8814
51.7884	569	28.9322
51.7873	570	28.9831
51.7873	571	29.0339
51.7877	572	29.0847
51.7877	573	29.1356
51.7884	574	29.1864
51.7884	575	29.2373
51.7876	576	29.2881
51.7876	577	29.339
51.7874	578	29.3898
51.7874	579	29.4407
51.7885	580	29.4915
51.7885	581	29.5424
51.7872	582	29.5932
51.7872	583	29.6441
51.7872	584	29.6949
51.7872	585	29.7458
51.789	586	29.7966
51.789	587	29.8475
51.7879	588	29.8983
51.7879	589	29.9492
51.787	590	30
51.787	591	30.0508
51.7885	592	30.1017
51.7885	593	30.1525
51.788	594	30.2034
51.788	595	30.2542
51.788	596	30.3051
51.7877	597	30.3559
51.7877	598	30.4068
51.789	599	30.4576
51.789	600	30.5085
51.7885	601	30.5593
51.7885	602	30.6102
51.7875	603	30.661
51.7875	604	30.7119
51.7891	605	30.7627
51.7891	606	30.8136
51.7882	607	30.8644
51.7882	608	30.9153
51.7871	609	30.9661
51.7871	610	31.0169
51.7884	611	31.0678
51.7884	612	31.1186
51.7881	613	31.1695
51.7881	614	31.2203
51.787	615	31.2712
51.787	616	31.322
51.7882	617	31.3729
51.7882	618	31.4237
51.7887	619	31.4746
51.7887	620	31.5254
51.7869	621	31.5763
51.7869	622	31.6271
51.7879	623	31.678
51.7879	624	31.7288
51.7879	625	31.7797
51.7883	626	31.8305
51.7883	627	31.8814
51.7869	628	31.9322
51.7869	629	31.9831
51.7872	630	32.0339
51.7872	631	32.0847
51.7885	632	32.1356
51.7885	633	32.1864
51.7868	634	32.2373
51.7868	635	32.2881
51.787	636	32.339
51.787	637	32.3898
51.7884	638	32.4407
51.7884	639	32.4915
51.7871	640	32.5424
51.7871	641	32.5932
51.7871	642	32.6441
51.7871	643	32.6949
51.7883	644	32.7458
51.7883	645	32.7966
51.7872	646	32.8475
51.7872	647	32.8983
51.787	648	32.9492
51.787	649	33
51.7881	650	33.0508
51.7881	651	33.1017
51.7873	652	33.1525
51.7873	653	33.2034
51.7868	654	33.2542
51.7868	655	33.3051
51.7868	656	33.3559
51.7882	657	33.4068
51.7882	658	33.4576
51.7876	659	33.5085
51.7876	660	33.5593
51.7871	661	33.6102
51.7871	662	33.661
51.788	663	33.7119
51.788	664	33.7627
51.7878	665	33.8136
51.7878	666	33.8644
51.7864	667	33.9153
51.7864	668	33.9661
51.7876	669	34.0169
51.7876	670	34.0678
51.7877	671	34.1186
51.7877	672	34.1695
51.7867	673	34.2203
51.7867	674	34.2712
51.7882	675	34.322
51.7882	676	34.3729
51.7879	677	34.4237
51.7879	678	34.4746
51.7863	679	34.5254
51.7863	680	34.5763
51.7876	681	34.6271
51.7876	682	34.678
51.7879	683	34.7288
51.7879	684	34.7797
51.7867	685	34.8305
51.7867	686	34.8814
51.7873	687	34.9322
51.7873	688	34.9831
51.7884	689	35.0339
51.7884	690	35.0847
51.7884	691	35.1356
51.7865	692	35.1864
51.7865	693	35.2373
51.787	694	35.2881
51.787	695	35.339
51.7883	696	35.3898
51.7883	697	35.4407
51.7868	698	35.4915
51.7868	699	35.5424
51.7872	700	35.5932
51.7872	701	35.6441
51.7883	702	35.6949
51.7883	703	35.7458
51.7873	704	35.7966
51.7873	705	35.8475
51.7867	706	35.8983
51.7867	707	35.9492
51.7881	708	36
51.7881	709	36.0508
51.7874	710	36.1017
51.7874	711	36.1525
51.787	712	36.2034
51.787	713	36.2542
51.7882	714	36.3051
51.7882	715	36.3559
51.7876	716	36.4068
51.7876	717	36.4576
51.7876	718	36.5085
51.7866	719	36.5593
51.7866	720	36.6102
51.7883	721	36.661
51.7883	722	36.7119
51.7885	723	36.7627
51.7885	724	36.8136
51.7864	725	36.8644
51.7864	726	36.9153
51.7881	727	36.9661
51.7881	728	37.0169
51.7879	729	37.0678
51.7879	730	37.1186
51.7867	731	37.1695
51.7867	732	37.2203
51.7876	733	37.2712
51.7876	734	37.322
51.788	735	37.3729
51.788	736	37.4237
51.787	737	37.4746
51.787	738	37.5254
51.7875	739	37.5763
51.7875	740	37.6271
51.7885	741	37.678
51.7885	742	37.7288
51.7868	743	37.7797
51.7868	744	37.8305
51.7871	745	37.8814
51.7871	746	37.9322
51.7889	747	37.9831
51.7889	748	38.0339
51.7889	749	38.0847
51.7868	750	38.1356
51.7868	751	38.1864
51.7869	752	38.2373
51.7869	753	38.2881
51.7881	754	38.339
51.7881	755	38.3898
51.7871	756	38.4407
51.7871	757	38.4915
51.787	758	38.5424
51.787	759	38.5932
51.7882	760	38.6441
51.7882	761	38.6949
51.7871	762	38.7458
51.7871	763	38.7966
51.7867	764	38.8475
51.7867	765	38.8983
51.7882	766	38.9492
51.7882	767	39
51.7875	768	39.0508
51.7875	769	39.1017
51.7868	770	39.1525
51.7868	771	39.2034
51.7883	772	39.2542
51.7883	773	39.3051
51.7883	774	39.3559
51.7877	775	39.4068
51.7877	776	39.4576
51.7868	777	39.5085
51.7868	778	39.5593
51.7879	779	39.6102
51.7879	780	39.661
51.7877	781	39.7119
51.7877	782	39.7627
51.7863	783	39.8136
51.7863	784	39.8644
51.7881	785	39.9153
51.7881	786	39.9661
51.7878	787	40.0169
51.7878	788	40.0678
51.7863	789	40.1186
51.7863	790	40.1695
51.7872	791	40.2203
51.7872	792	40.2712
51.7881	793	40.322
51.7881	794	40.3729
51.7866	795	40.4237
51.7866	796	40.4746
51.7873	797	40.5254
51.7873	798	40.5763
51.7873	799	40.6271
51.7881	800	40.678
51.7881	801	40.7288
51.7867	802	40.7797
51.7867	803	40.8305
51.787	804	40.8814
51.787	805	40.9322
51.788	806	40.9831
51.788	807	41.0339
51.7868	808	41.0847
51.7868	809	41.1356
51.7868	810	41.1864
51.7868	811	41.2373
51.7886	812	41.2881
51.7886	813	41.339
51.7869	814	41.3898
51.7869	815	41.4407
51.7868	816	41.4915
51.7868	817	41.5424
51.788	818	41.5932
51.788	819	41.6441
51.7872	820	41.6949
51.7872	821	41.7458
51.7867	822	41.7966
51.7867	823	41.8475
51.7878	824	41.8983
51.7878	825	41.9492
51.7875	826	42
51.7875	827	42.0508
51.7864	828	42.1017
51.7864	829	42.1525
51.7864	830	42.2034
51.7877	831	42.2542
51.7877	832	42.3051
51.7878	833	42.3559
51.7878	834	42.4068
51.7865	835	42.4576
51.7865	836	42.5085
51.788	837	42.5593
51.788	838	42.6102
51.7879	839	42.661
51.7879	840	42.7119
51.7867	841	42.7627
51.7867	842	42.8136
51.7876	843	42.8644
51.7876	844	42.9153
51.7882	845	42.9661
51.7882	846	43.0169
51.7866	847	43.0678
51.7866	848	43.1186
51.7873	849	43.1695
51.7873	850	43.2203
51.7885	851	43.2712
51.7885	852	43.322
51.7871	853	43.3729
51.7871	854	43.4237
51.7875	855	43.4746
51.7875	856	43.5254
51.789	857	43.5763
51.789	858	43.6271
51.7874	859	43.678
51.7874	860	43.7288
51.7874	861	43.7797
51.787	862	43.8305
51.787	863	43.8814
51.7888	864	43.9322
51.7888	865	43.9831
51.7875	866	44.0339
51.7875	867	44.0847
51.7871	868	44.1356
51.7871	869	44.1864
51.789	870	44.2373
51.789	871	44.2881
51.788	872	44.339
51.788	873	44.3898
51.7867	874	44.4407
51.7867	875	44.4915
51.7886	876	44.5424
51.7886	877	44.5932
51.788	878	44.6441
51.788	879	44.6949
51.7866	880	44.7458
51.7866	881	44.7966
51.7881	882	44.8475
51.7881	883	44.8983
51.788	884	44.9492
51.788	885	45
51.7865	886	45.0508
51.7865	887	45.1017
51.788	888	45.1525
51.788	889	45.2034
51.7882	890	45.2542
51.7882	891	45.3051
51.7868	892	45.3559
51.7868	893	45.4068
51.7868	894	45.4576
51.7877	895	45.5085
51.7877	896	45.5593
51.7883	897	45.6102
51.7883	898	45.661
51.7867	899	45.7119
51.7867	900	45.7627
51.7873	901	45.8136
51.7873	902	45.8644
51.7888	903	45.9153
51.7888	904	45.9661
51.7872	905	46.0169
51.7872	906	46.0678
51.787	907	46.1186
51.787	908	46.1695
51.7888	909	46.2203
51.7888	910	46.2712
51.7874	911	46.322
51.7874	912	46.3729
51.7871	913	46.4237
51.7871	914	46.4746
51.7884	915	46.5254
51.7884	916	46.5763
51.7878	917	46.6271
51.7878	918	46.678
51.7867	919	46.7288
51.7867	920	46.7797
51.7885	921	46.8305
51.7885	922	46.8814
51.7878	923	46.9322
51.7878	924	46.9831
51.7878	925	47.0339
51.787	926	47.0847
51.787	927	47.1356
51.7882	928	47.1864
51.7882	929	47.2373
51.7878	930	47.2881
51.7878	931	47.339
51.7865	932	47.3898
51.7865	933	47.4407
51.7881	934	47.4915
51.7881	935	47.5424
51.7884	936	47.5932
51.7884	937	47.6441
51.787	938	47.6949
51.787	939	47.7458
51.7882	940	47.7966
51.7882	941	47.8475
51.7885	942	47.8983
51.7885	943	47.9492
51.787	944	48
51.787	945	48.0508
51.7876	946	48.1017
51.7876	947	48.1525
51.7885	948	48.2034
51.7885	949	48.2542
51.787	950	48.3051
51.787	951	48.3559
51.7872	952	48.4068
51.7872	953	48.4576
51.7889	954	48.5085
51.7889	955	48.5593
51.7889	956	48.6102
51.787	957	48.661
51.787	958	48.7119
51.7872	959	48.7627
51.7872	960	48.8136
51.7884	961	48.8644
51.7884	962	48.9153
51.7873	963	48.9661
51.7873	964	49.0169
51.7872	965	49.0678
51.7872	966	49.1186
51.7886	967	49.1695
51.7886	968	49.2203
51.7874	969	49.2712
51.7874	970	49.322
51.7874	971	49.3729
51.7874	972	49.4237
51.7884	973	49.4746
51.7884	974	49.5254
51.7877	975	49.5763
51.7877	976	49.6271
51.787	977	49.678
51.787	978	49.7288
51.7884	979	49.7797
51.7884	980	49.8305
51.7877	981	49.8814
51.7877	982	49.9322
51.7866	983	49.9831
51.7866	984	50.0339
51.7881	985	50.0847
51.7881	986	50.1356
51.7881	987	50.1864
51.7885	988	50.2373
51.7885	989	50.2881
51.7872	990	50.339
51.7872	991	50.3898
51.7879	992	50.4407
51.7879	993	50.4915
51.788	994	50.5424
51.788	995	50.5932
51.7868	996	50.6441
51.7868	997	50.6949
51.7872	998	50.7458
51.7872	999	50.7966
51.7881	1000	50.8475
51.7881	1001	50.8983
51.7873	1002	50.9492
51.7873	1003	51
51.787	1004	51.0508
51.787	1005	51.1017
51.7885	1006	51.1525
51.7885	1007	51.2034
51.7873	1008	51.2542
51.7873	1009	51.3051
51.7868	1010	51.3559
51.7868	1011	51.4068
51.7886	1012	51.4576
51.7886	1013	51.5085
51.7872	1014	51.5593
51.7872	1015	51.6102
51.7872	1016	51.661
51.7872	1017	51.7119
51.7872	1018	51.7627
51.7887	1019	51.8136
51.7887	1020	51.8644
51.7871	1021	51.9153
51.7871	1022	51.9661
51.7869	1023	52.0169
51.7869	1024	52.0678
51.7883	1025	52.1186
51.7883	1026	52.1695
51.7874	1027	52.2203
51.7874	1028	52.2712
51.7868	1029	52.322
51.7868	1030	52.3729
51.788	1031	52.4237
51.788	1032	52.4746
51.7882	1033	52.5254
51.7882	1034	52.5763
51.7866	1035	52.6271
51.7866	1036	52.678
51.7884	1037	52.7288
51.7884	1038	52.7797
51.7882	1039	52.8305
51.7882	1040	52.8814
51.7866	1041	52.9322
51.7866	1042	52.9831
51.788	1043	53.0339
51.788	1044	53.0847
51.788	1045	53.1356
51.7881	1046	53.1864
51.7881	1047	53.2373
51.7866	1048	53.2881
51.7866	1049	53.339
51.7879	1050	53.3898
51.7879	1051	53.4407
51.7885	1052	53.4915
51.7885	1053	53.5424
51.787	1054	53.5932
51.787	1055	53.6441
51.7875	1056	53.6949
51.7875	1057	53.7458
51.7885	1058	53.7966
51.7885	1059	53.8475
51.7872	1060	53.8983
51.7872	1061	53.9492
51.7871	1062	54
51.7871	1063	54.0508
51.7888	1064	54.1017
51.7888	1065	54.1525
51.7873	1066	54.2034
51.7873	1067	54.2542
51.7872	1068	54.3051
51.7872	1069	54.3559
51.7888	1070	54.4068
51.7888	1071	54.4576
51.7873	1072	54.5085
51.7873	1073	54.5593
51.787	1074	54.6102
51.787	1075	54.661
51.787	1076	54.7119
51.7884	1077	54.7627
51.7884	1078	54.8136
51.7874	1079	54.8644
51.7874	1080	54.9153
51.787	1081	54.9661
51.787	1082	55.0169
51.7888	1083	55.0678
51.7888	1084	55.1186
51.7875	1085	55.1695
51.7875	1086	55.2203
51.7868	1087	55.2712
51.7868	1088	55.322
51.7881	1089	55.3729
51.7881	1090	55.4237
51.7876	1091	55.4746
51.7876	1092	55.5254
51.7865	1093	55.5763
51.7865	1094	55.6271
51.7877	1095	55.678
51.7877	1096	55.7288
51.7876	1097	55.7797
51.7876	1098	55.8305
51.7864	1099	55.8814
51.7864	1100	55.9322
51.788	1101	55.9831
51.788	1102	56.0339
51.788	1103	56.0847
51.7879	1104	56.1356
51.7879	1105	56.1864
51.7865	1106	56.2373
51.7865	1107	56.2881
51.7878	1108	56.339
51.7878	1109	56.3898
51.7878	1110	56.4407
51.7878	1111	56.4915
51.7867	1112	56.5424
51.7867	1113	56.5932
51.7871	1114	56.6441
51.7871	1115	56.6949
51.788	1116	56.7458
51.788	1117	56.7966
51.7869	1118	56.8475
51.7869	1119	56.8983
51.7871	1120	56.9492
51.7871	1121	57
51.7885	1122	57.0508
51.7885	1123	57.1017
51.7869	1124	57.1525
51.7869	1125	57.2034
51.7868	1126	57.2542
51.7868	1127	57.3051
51.7885	1128	57.3559
51.7885	1129	57.4068
51.7871	1130	57.4576
51.7871	1131	57.5085
51.7871	1132	57.5593
51.7868	1133	57.6102
51.7868	1134	57.661
51.7884	1135	57.7119
51.7884	1136	57.7627
51.7875	1137	57.8136
51.7875	1138	57.8644
51.7871	1139	57.9153
51.7871	1140	57.9661
51.7889	1141	58.0169
51.7889	1142	58.0678
51.788	1143	58.1186
51.788	1144	58.1695
51.7872	1145	58.2203
51.7872	1146	58.2712
51.7884	1147	58.322
51.7884	1148	58.3729
51.7886	1149	58.4237
51.7886	1150	58.4746
51.7874	1151	58.5254
51.7874	1152	58.5763
51.7888	1153	58.6271
51.7888	1154	58.678
51.7885	1155	58.7288
51.7885	1156	58.7797
51.7885	1157	58.8305
51.7878	1158	58.8814
51.7878	1159	58.9322
51.7885	1160	58.9831
51.7885	1161	59.0339
51.7895	1162	59.0847
51.7895	1163	59.1356
51.7877	1164	59.1864
51.7877	1165	59.2373
51.7889	1166	59.2881
51.7889	1167	59.339
51.7892	1168	59.3898
51.7892	1169	59.4407
51.7877	1170	59.4915
51.7877	1171	59.5424
51.7877	1172	59.5932
51.7877	1173	59.6441
51.7884	1174	59.6949
51.7884	1175	59.7458
51.7866	1176	59.7966
51.7866	1177	59.8475
51.7862	1178	59.8983
51.7862	1179	59.9492
51.7883	1180	60
51.7883	1181	60.0508
51.7879	1182	60.1017
51.7879	1183	60.1525
51.7876	1184	60.2034
51.7876	1185	60.2542
51.7876	1186	60.3051
51.789	1187	60.3559
51.789	1188	60.4068
51.7873	1189	60.4576
51.7873	1190	60.5085
51.787	1191	60.5593
51.787	1192	60.6102
51.7881	1193	60.661
51.7881	1194	60.7119
51.7862	1195	60.7627
51.7862	1196	60.8136
51.7858	1197	60.8644
51.7858	1198	60.9153
51.7878	1199	60.9661
51.7878	1200	61.0169
51.7866	1201	61.0678
51.7866	1202	61.1186
51.7858	1203	61.1695
51.7858	1204	61.2203
51.7877	1205	61.2712
51.7877	1206	61.322
51.787	1207	61.3729
51.787	1208	61.4237
51.7858	1209	61.4746
51.7858	1210	61.5254
51.7874	1211	61.5763
51.7874	1212	61.6271
51.7873	1213	61.678
51.7873	1214	61.7288
51.7855	1215	61.7797
51.7855	1216	61.8305
51.7869	1217	61.8814
51.7869	1218	61.9322
51.7869	1219	61.9831
51.7862	1220	62.0339
51.7862	1221	62.0847
51.7848	1222	62.1356
51.7848	1223	62.1864
51.7861	1224	62.2373
51.7861	1225	62.2881
51.7853	1226	62.339
51.7853	1227	62.3898
51.7839	1228	62.4407
51.7839	1229	62.4915
51.7848	1230	62.5424
51.7848	1231	62.5932
51.7853	1232	62.6441
51.7853	1233	62.6949
51.784	1234	62.7458
51.784	1235	62.7966
51.7844	1236	62.8475
51.7844	1237	62.8983
51.7857	1238	62.9492
51.7857	1239	63
51.7842	1240	63.0508
51.7842	1241	63.1017
51.7845	1242	63.1525
51.7845	1243	63.2034
51.7855	1244	63.2542
51.7855	1245	63.3051
51.7838	1246	63.3559
51.7838	1247	63.4068
51.7835	1248	63.4576
51.7835	1249	63.5085
51.7835	1250	63.5593
51.7851	1251	63.6102
51.7851	1252	63.661
51.7837	1253	63.7119
51.7837	1254	63.7627
51.7836	1255	63.8136
51.7836	1256	63.8644
51.7847	1257	63.9153
51.7847	1258	63.9661
51.784	1259	64.0169
51.784	1260	64.0678
51.7833	1261	64.1186
51.7833	1262	64.1695
51.7848	1263	64.2203
51.7848	1264	64.2712
51.7838	1265	64.322
51.7838	1266	64.3729
51.783	1267	64.4237
51.783	1268	64.4746
51.7843	1269	64.5254
51.7843	1270	64.5763
51.7841	1271	64.6271
51.7841	1272	64.678
51.7827	1273	64.7288
51.7827	1274	64.7797
51.7827	1275	64.8305
51.7841	1276	64.8814
51.7841	1277	64.9322
51.7842	1278	64.9831
51.7842	1279	65.0339
51.7829	1280	65.0847
51.7829	1281	65.1356
51.7844	1282	65.1864
51.7844	1283	65.2373
51.7842	1284	65.2881
51.7842	1285	65.339
51.7831	1286	65.3898
51.7831	1287	65.4407
51.7846	1288	65.4915
51.7846	1289	65.5424
51.7843	1290	65.5932
51.7843	1291	65.6441
51.7831	1292	65.6949
51.7831	1293	65.7458
51.7838	1294	65.7966
51.7838	1295	65.8475
51.7848	1296	65.8983
51.7848	1297	65.9492
51.7833	1298	66
51.7833	1299	66.0508
51.7836	1300	66.1017
51.7836	1301	66.1525
51.7848	1302	66.2034
51.7848	1303	66.2542
51.7833	1304	66.3051
51.7833	1305	66.3559
51.7838	1306	66.4068
51.7838	1307	66.4576
51.7848	1308	66.5085
51.7848	1309	66.5593
51.7848	1310	66.6102
51.7837	1311	66.661
51.7837	1312	66.7119
51.7834	1313	66.7627
51.7834	1314	66.8136
51.7847	1315	66.8644
51.7847	1316	66.9153
51.7838	1317	66.9661
51.7838	1318	67.0169
51.7833	1319	67.0678
51.7833	1320	67.1186
51.7853	1321	67.1695
51.7853	1322	67.2203
51.784	1323	67.2712
51.784	1324	67.322
51.783	1325	67.3729
51.783	1326	67.4237
51.7845	1327	67.4746
51.7845	1328	67.5254
51.7841	1329	67.5763
51.7841	1330	67.6271
51.783	1331	67.678
51.783	1332	67.7288
51.7844	1333	67.7797
51.7844	1334	67.8305
51.7842	1335	67.8814
51.7842	1336	67.9322
51.783	1337	67.9831
51.783	1338	68.0339
51.7845	1339	68.0847
51.7845	1340	68.1356
51.7844	1341	68.1864
51.7844	1342	68.2373
51.7844	1343	68.2881
51.7829	1344	68.339
51.7829	1345	68.3898
51.7842	1346	68.4407
51.7842	1347	68.4915
51.7847	1348	68.5424
51.7847	1349	68.5932
51.7831	1350	68.6441
51.7831	1351	68.6949
51.784	1352	68.7458
51.784	1353	68.7966
51.7848	1354	68.8475
51.7848	1355	68.8983
51.7832	1356	68.9492
51.7832	1357	69
51.7839	1358	69.0508
51.7839	1359	69.1017
51.7855	1360	69.1525
51.7855	1361	69.2034
51.7833	1362	69.2542
51.7833	1363	69.3051
51.784	1364	69.3559
51.784	1365	69.4068
51.7851	1366	69.4576
51.7851	1367	69.5085
51.7835	1368	69.5593
51.7835	1369	69.6102
51.7839	1370	69.661
51.7839	1371	69.7119
51.785	1372	69.7627
51.785	1373	69.8136
51.7837	1374	69.8644
51.7837	1375	69.9153
51.7837	1376	69.9661
51.7836	1377	70.0169
51.7836	1378	70.0678
51.7849	1379	70.1186
51.7849	1380	70.1695
51.7836	1381	70.2203
51.7836	1382	70.2712
51.7837	1383	70.322
51.7837	1384	70.3729
51.7849	1385	70.4237
51.7849	1386	70.4746
51.7839	1387	70.5254
51.7839	1388	70.5763
51.7836	1389	70.6271
51.7836	1390	70.678
51.785	1391	70.7288
51.785	1392	70.7797
51.784	1393	70.8305
51.784	1394	70.8814
51.7835	1395	70.9322
51.7835	1396	70.9831
51.7849	1397	71.0339
51.7849	1398	71.0847
51.7844	1399	71.1356
51.7844	1400	71.1864
51.7833	1401	71.2373
51.7833	1402	71.2881
51.7851	1403	71.339
51.7851	1404	71.3898
51.7851	1405	71.4407
51.7847	1406	71.4915
51.7847	1407	71.5424
51.7834	1408	71.5932
51.7834	1409	71.6441
51.7847	1410	71.6949
51.7847	1411	71.7458
51.7847	1412	71.7966
51.7847	1413	71.8475
51.7838	1414	71.8983
51.7838	1415	71.9492
51.7847	1416	72
51.7847	1417	72.0508
51.7849	1418	72.1017
51.7849	1419	72.1525
51.7833	1420	72.2034
51.7833	1421	72.2542
51.7845	1422	72.3051
51.7845	1423	72.3559
51.785	1424	72.4068
51.785	1425	72.4576
51.784	1426	72.5085
51.784	1427	72.5593
51.7845	1428	72.6102
51.7845	1429	72.661
51.785	1430	72.7119
51.785	1431	72.7627
51.7839	1432	72.8136
51.7839	1433	72.8644
51.784	1434	72.9153
51.784	1435	72.9661
51.784	1436	73.0169
51.7853	1437	73.0678
51.7853	1438	73.1186
51.7841	1439	73.1695
51.7841	1440	73.2203
51.784	1441	73.2712
51.784	1442	73.322
51.7857	1443	73.3729
51.7857	1444	73.4237
51.7839	1445	73.4746
51.7839	1446	73.5254
51.7843	1447	73.5763
51.7843	1448	73.6271
51.7858	1449	73.678
51.7858	1450	73.7288
51.7845	1451	73.7797
51.7845	1452	73.8305
51.7842	1453	73.8814
51.7842	1454	73.9322
51.7856	1455	73.9831
51.7856	1456	74.0339
51.7847	1457	74.0847
51.7847	1458	74.1356
51.7843	1459	74.1864
51.7843	1460	74.2373
51.7857	1461	74.2881
51.7857	1462	74.339
51.785	1463	74.3898
51.785	1464	74.4407
51.785	1465	74.4915
51.7844	1466	74.5424
51.7844	1467	74.5932
51.7861	1468	74.6441
51.7861	1469	74.6949
51.7849	1470	74.7458
51.7849	1471	74.7966
51.7845	1472	74.8475
51.7845	1473	74.8983
51.7857	1474	74.9492
51.7857	1475	75
51.7851	1476	75.0508
51.7851	1477	75.1017
51.7842	1478	75.1525
51.7842	1479	75.2034
51.786	1480	75.2542
51.786	1481	75.3051
51.786	1482	75.3559
51.786	1483	75.4068
51.7848	1484	75.4576
51.7848	1485	75.5085
51.7864	1486	75.5593
51.7864	1487	75.6102
51.7859	1488	75.661
51.7859	1489	75.7119
51.7859	1490	75.7627
51.7848	1491	75.8136
51.7848	1492	75.8644
51.7864	1493	75.9153
51.7864	1494	75.9661
51.7858	1495	76.0169
51.7858	1496	76.0678
51.7847	1497	76.1186
51.7847	1498	76.1695
51.7859	1499	76.2203
51.7859	1500	76.2712
51.7864	1501	76.322
51.7864	1502	76.3729
51.7851	1503	76.4237
51.7851	1504	76.4746
51.786	1505	76.5254
51.786	1506	76.5763
51.7864	1507	76.6271
51.7864	1508	76.678
51.7853	1509	76.7288
51.7853	1510	76.7797
51.786	1511	76.8305
51.786	1512	76.8814
51.7866	1513	76.9322
51.7866	1514	76.9831
51.7856	1515	77.0339
51.7856	1516	77.0847
51.7858	1517	77.1356
51.7858	1518	77.1864
51.787	1519	77.2373
51.787	1520	77.2881
51.787	1521	77.339
51.7856	1522	77.3898
51.7856	1523	77.4407
51.7861	1524	77.4915
51.7861	1525	77.5424
51.7872	1526	77.5932
51.7872	1527	77.6441
51.786	1528	77.6949
51.786	1529	77.7458
51.7862	1530	77.7966
51.7862	1531	77.8475
51.7872	1532	77.8983
51.7872	1533	77.9492
51.7859	1534	78
51.7859	1535	78.0508
51.7859	1536	78.1017
51.7859	1537	78.1525
51.7874	1538	78.2034
51.7874	1539	78.2542
51.7864	1540	78.3051
51.7864	1541	78.3559
51.786	1542	78.4068
51.786	1543	78.4576
51.7875	1544	78.5085
51.7875	1545	78.5593
51.7866	1546	78.6102
51.7866	1547	78.661
51.7866	1548	78.7119
51.7861	1549	78.7627
51.7861	1550	78.8136
51.7875	1551	78.8644
51.7875	1552	78.9153
51.7867	1553	78.9661
51.7867	1554	79.0169
51.7861	1555	79.0678
51.7861	1556	79.1186
51.7877	1557	79.1695
51.7877	1558	79.2203
51.7867	1559	79.2712
51.7867	1560	79.322
51.7862	1561	79.3729
51.7862	1562	79.4237
51.7875	1563	79.4746
51.7875	1564	79.5254
51.7867	1565	79.5763
51.7867	1566	79.6271
51.7859	1567	79.678
51.7859	1568	79.7288
51.7876	1569	79.7797
51.7876	1570	79.8305
51.7875	1571	79.8814
51.7875	1572	79.9322
51.7864	1573	79.9831
51.7864	1574	80.0339
51.7879	1575	80.0847
51.7879	1576	80.1356
51.7879	1577	80.1864
51.7877	1578	80.2373
51.7877	1579	80.2881
51.7866	1580	80.339
51.7866	1581	80.3898
51.7881	1582	80.4407
51.7881	1583	80.4915
51.7877	1584	80.5424
51.7877	1585	80.5932
51.7865	1586	80.6441
51.7865	1587	80.6949
51.788	1588	80.7458
51.788	1589	80.7966
51.7881	1590	80.8475
51.7881	1591	80.8983
51.7867	1592	80.9492
51.7867	1593	81
51.7877	1594	81.0508
51.7877	1595	81.1017
51.7884	1596	81.1525
51.7884	1597	81.2034
51.7869	1598	81.2542
51.7869	1599	81.3051
51.7884	1600	81.3559
51.7884	1601	81.4068
51.7884	1602	81.4576
51.7884	1603	81.5085
51.7873	1604	81.5593
51.7873	1605	81.6102
51.788	1606	81.661
51.788	1607	81.7119
51.788	1608	81.7627
51.7886	1609	81.8136
51.7886	1610	81.8644
51.7872	1611	81.9153
51.7872	1612	81.9661
51.7878	1613	82.0169
51.7878	1614	82.0678
51.7891	1615	82.1186
51.7891	1616	82.1695
51.7877	1617	82.2203
51.7877	1618	82.2712
51.788	1619	82.322
51.788	1620	82.3729
51.789	1621	82.4237
51.789	1622	82.4746
51.7879	1623	82.5254
51.7879	1624	82.5763
51.7879	1625	82.6271
51.7879	1626	82.678
51.7897	1627	82.7288
51.7897	1628	82.7797
51.7877	1629	82.8305
51.7877	1630	82.8814
51.7882	1631	82.9322
51.7882	1632	82.9831
51.7894	1633	83.0339
51.7894	1634	83.0847
51.7885	1635	83.1356
51.7885	1636	83.1864
51.7883	1637	83.2373
51.7883	1638	83.2881
51.7894	1639	83.339
51.7894	1640	83.3898
51.7894	1641	83.4407
51.7886	1642	83.4915
51.7886	1643	83.5424
51.7883	1644	83.5932
51.7883	1645	83.6441
51.79	1646	83.6949
51.79	1647	83.7458
51.7886	1648	83.7966
51.7886	1649	83.8475
51.7883	1650	83.8983
51.7883	1651	83.9492
51.7903	1652	84
51.7903	1653	84.0508
51.7891	1654	84.1017
51.7891	1655	84.1525
51.7884	1656	84.2034
51.7884	1657	84.2542
51.7901	1658	84.3051
51.7901	1659	84.3559
51.7889	1660	84.4068
51.7889	1661	84.4576
51.7886	1662	84.5085
51.7886	1663	84.5593
51.7899	1664	84.6102
51.7899	1665	84.661
51.7893	1666	84.7119
51.7893	1667	84.7627
51.7893	1668	84.8136
51.7886	1669	84.8644
51.7886	1670	84.9153
51.7903	1671	84.9661
51.7903	1672	85.0169
51.7896	1673	85.0678
51.7896	1674	85.1186
51.789	1675	85.1695
51.789	1676	85.2203
51.7901	1677	85.2712
51.7901	1678	85.322
51.79	1679	85.3729
51.79	1680	85.4237
51.7887	1681	85.4746
51.7887	1682	85.5254
51.7903	1683	85.5763
51.7903	1684	85.6271
51.7903	1685	85.678
51.7903	1686	85.7288
51.7889	1687	85.7797
51.7889	1688	85.8305
51.7903	1689	85.8814
51.7903	1690	85.9322
51.7902	1691	85.9831
51.7902	1692	86.0339
51.7892	1693	86.0847
51.7892	1694	86.1356
51.7905	1695	86.1864
51.7905	1696	86.2373
51.7904	1697	86.2881
51.7904	1698	86.339
51.7904	1699	86.3898
51.789	1700	86.4407
51.789	1701	86.4915
51.7904	1702	86.5424
51.7904	1703	86.5932
51.7908	1704	86.6441
51.7908	1705	86.6949
51.7893	1706	86.7458
51.7893	1707	86.7966
51.7904	1708	86.8475
51.7904	1709	86.8983
51.7911	1710	86.9492
51.7911	1711	87
51.7897	1712	87.0508
51.7897	1713	87.1017
51.7904	1714	87.1525
51.7904	1715	87.2034
51.7912	1716	87.2542
51.7912	1717	87.3051
51.7895	1718	87.3559
51.7895	1719	87.4068
51.7901	1720	87.4576
51.7901	1721	87.5085
51.7911	1722	87.5593
51.7911	1723	87.6102
51.7898	1724	87.661
51.7898	1725	87.7119
51.7899	1726	87.7627
51.7899	1727	87.8136
51.7918	1728	87.8644
51.7918	1729	87.9153
51.7918	1730	87.9661
51.7905	1731	88.0169
51.7905	1732	88.0678
51.7904	1733	88.1186
51.7904	1734	88.1695
51.7918	1735	88.2203
51.7918	1736	88.2712
51.7902	1737	88.322
51.7902	1738	88.3729
51.7902	1739	88.4237
51.7902	1740	88.4746
51.7924	1741	88.5254
51.7924	1742	88.5763
51.7909	1743	88.6271
51.7909	1744	88.678
51.7903	1745	88.7288
51.7903	1746	88.7797
51.7918	1747	88.8305
51.7918	1748	88.8814
51.7909	1749	88.9322
51.7909	1750	88.9831
51.7904	1751	89.0339
51.7904	1752	89.0847
51.7922	1753	89.1356
51.7922	1754	89.1864
51.7912	1755	89.2373
51.7912	1756	89.2881
51.7908	1757	89.339
51.7908	1758	89.3898
51.7908	1759	89.4407
51.7925	1760	89.4915
51.7925	1761	89.5424
51.7915	1762	89.5932
51.7915	1763	89.6441
51.7912	1764	89.6949
51.7912	1765	89.7458
51.7922	1766	89.7966
51.7922	1767	89.8475
51.7917	1768	89.8983
51.7917	1769	89.9492
51.7909	1770	90
51.7909	1771	90.0508
51.7925	1772	90.1017
51.7925	1773	90.1525
51.7923	1774	90.2034
51.7923	1775	90.2542
51.7911	1776	90.3051
51.7911	1777	90.3559
51.7926	1778	90.4068
51.7926	1779	90.4576
51.7922	1780	90.5085
51.7922	1781	90.5593
51.791	1782	90.6102
51.791	1783	90.661
51.7929	1784	90.7119
51.7929	1785	90.7627
51.7921	1786	90.8136
51.7921	1787	90.8644
51.7921	1788	90.9153
51.7911	1789	90.9661
51.7911	1790	91.0169
51.7926	1791	91.0678
51.7926	1792	91.1186
51.7928	1793	91.1695
51.7928	1794	91.2203
51.7913	1795	91.2712
51.7913	1796	91.322
51.7925	1797	91.3729
51.7925	1798	91.4237
51.793	1799	91.4746
51.793	1800	91.5254
51.792	1801	91.5763
51.792	1802	91.6271
51.7927	1803	91.678
51.7927	1804	91.7288
51.7933	1805	91.7797
51.7933	1806	91.8305
51.7916	1807	91.8814
51.7916	1808	91.9322
51.7929	1809	91.9831
51.7929	1810	92.0339
51.7935	1811	92.0847
51.7935	1812	92.1356
51.7916	1813	92.1864
51.7916	1814	92.2373
51.7926	1815	92.2881
51.7926	1816	92.339
51.7932	1817	92.3898
51.7932	1818	92.4407
51.7921	1819	92.4915
51.7921	1820	92.5424
51.7929	1821	92.5932
51.7929	1822	92.6441
51.7929	1823	92.6949
51.7941	1824	92.7458
51.7941	1825	92.7966
51.7923	1826	92.8475
51.7923	1827	92.8983
51.7929	1828	92.9492
51.7929	1829	93
51.7941	1830	93.0508
51.7941	1831	93.1017
51.7926	1832	93.1525
51.7926	1833	93.2034
51.7926	1834	93.2542
51.7926	1835	93.3051
51.7941	1836	93.3559
51.7941	1837	93.4068
51.7931	1838	93.4576
51.7931	1839	93.5085
51.793	1840	93.5593
51.793	1841	93.6102
51.7942	1842	93.661
51.7942	1843	93.7119
51.7934	1844	93.7627
51.7934	1845	93.8136
51.7928	1846	93.8644
51.7928	1847	93.9153
51.7946	1848	93.9661
51.7946	1849	94.0169
51.7946	1850	94.0678
51.7933	1851	94.1186
51.7933	1852	94.1695
51.793	1853	94.2203
51.793	1854	94.2712
51.7946	1855	94.322
51.7946	1856	94.3729
51.7938	1857	94.4237
51.7938	1858	94.4746
51.7932	1859	94.5254
51.7932	1860	94.5763
51.7947	1861	94.6271
51.7947	1862	94.678
51.7939	1863	94.7288
51.7939	1864	94.7797
51.7933	1865	94.8305
51.7933	1866	94.8814
51.7948	1867	94.9322
51.7948	1868	94.9831
51.7941	1869	95.0339
51.7941	1870	95.0847
51.7932	1871	95.1356
51.7932	1872	95.1864
51.7951	1873	95.2373
51.7951	1874	95.2881
51.7951	1875	95.339
51.7944	1876	95.3898
51.7944	1877	95.4407
51.7938	1878	95.4915
51.7938	1879	95.5424
51.7951	1880	95.5932
51.7951	1881	95.6441
51.7947	1882	95.6949
51.7947	1883	95.7458
51.7941	1884	95.7966
51.7941	1885	95.8475
51.7953	1886	95.8983
51.7953	1887	95.9492
51.795	1888	96
51.795	1889	96.0508
51.7939	1890	96.1017
51.7939	1891	96.1525
51.7954	1892	96.2034
51.7954	1893	96.2542
51.7955	1894	96.3051
51.7955	1895	96.3559
51.7943	1896	96.4068
51.7943	1897	96.4576
51.7957	1898	96.5085
51.7957	1899	96.5593
51.7956	1900	96.6102
51.7956	1901	96.661
51.7941	1902	96.7119
51.7941	1903	96.7627
51.7956	1904	96.8136
51.7956	1905	96.8644
51.7956	1906	96.9153
51.7958	1907	96.9661
51.7958	1908	97.0169
51.7943	1909	97.0678
51.7943	1910	97.1186
51.7956	1911	97.1695
51.7956	1912	97.2203
51.7962	1913	97.2712
51.7962	1914	97.322
51.7948	1915	97.3729
51.7948	1916	97.4237
51.7953	1917	97.4746
51.7953	1918	97.5254
51.7964	1919	97.5763
51.7964	1920	97.6271
51.795	1921	97.678
51.795	1922	97.7288
51.7955	1923	97.7797
51.7955	1924	97.8305
51.7966	1925	97.8814
51.7966	1926	97.9322
51.7953	1927	97.9831
51.7953	1928	98.0339
51.7958	1929	98.0847
51.7958	1930	98.1356
51.7968	1931	98.1864
51.7968	1932	98.2373
51.7954	1933	98.2881
51.7954	1934	98.339
51.7957	1935	98.3898
51.7957	1936	98.4407
51.7957	1937	98.4915
51.7971	1938	98.5424
51.7971	1939	98.5932
51.7959	1940	98.6441
51.7959	1941	98.6949
51.7958	1942	98.7458
51.7958	1943	98.7966
51.7973	1944	98.8475
51.7973	1945	98.8983
51.7958	1946	98.9492
51.7958	1947	99
51.7959	1948	99.0508
51.7959	1949	99.1017
51.7976	1950	99.1525
51.7976	1951	99.2034
51.7962	1952	99.2542
51.7962	1953	99.3051
51.7958	1954	99.3559
51.7958	1955	99.4068
51.7976	1956	99.4576
51.7976	1957	99.5085
51.7968	1958	99.5593
51.7968	1959	99.6102
51.796	1960	99.661
51.796	1961	99.7119
51.7977	1962	99.7627
51.7977	1963	99.8136
51.7971	1964	99.8644
51.7971	1965	99.9153
51.7966	1966	99.9661
51.7966	1967	100.017
51.7982	1968	100.068
51.7982	1969	100.119
51.7982	1970	100.169
51.797	1971	100.22
51.797	1972	100.271
51.7964	1973	100.322
51.7964	1974	100.373
51.7979	1975	100.424
51.7979	1976	100.475
51.7972	1977	100.525
51.7972	1978	100.576
51.7964	1979	100.627
51.7964	1980	100.678
51.798	1981	100.729
51.798	1982	100.78
51.7979	1983	100.831
51.7979	1984	100.881
51.7965	1985	100.932
51.7965	1986	100.983
51.7979	1987	101.034
51.7979	1988	101.085
51.798	1989	101.136
51.798	1990	101.186
51.7969	1991	101.237
51.7969	1992	101.288
51.798	1993	101.339
51.798	1994	101.39
51.7982	1995	101.441
51.7982	1996	101.492
51.797	1997	101.542
51.797	1998	101.593
[truncated: 1,542 more rows]
